# Supplementary material for: Evaluating Structural Variation Detection Tools for Long-Read Sequencing Datasets in Saccharomyces cerevisiae
Source: Front Genet. 2020 Mar 9;11:159. doi: 10.3389/fgene.2020.00159 (PMC7075250; doi:10.3389/fgene.2020.00159)
Supplement: Supplementary file 2 [file Table_1.xlsx]

## Sheet: Table S1
Table S1. The basic information and mapping ratio of samples
Sample	Project_ID	Platform	#of Bases(M)	Coverage	minimap2	NMGLR	Center Name	Library Name	Organism	Strain	Isolation_source	Sample_type
SAMD00082707	PRJDB5836	PacBio RSII	2980	252	0.8602	0.776	KAGOSHIMA	Kagoshima no. 2 PacBio RS II	Saccharomyces cerevisiae	Kagoshima no. 2	brewery	missing
SAMN08364553	PRJNA429985	PacBio Sequel	3742	317	0.9716	0.9533	FRASERGEN BIOINFOMATICS	WT	Saccharomyces cerevisiae	BY4742	cultured	cell culture
SAMN08364554	PRJNA429985	PacBio Sequel	4852	411	0.9279	0.9104	FRASERGEN BIOINFOMATICS	SY14	Saccharomyces cerevisiae	SY14	missing	cell culture
SAMN09475318_rs2	PRJNA477598	PacBio RSII	1693	143	0.4029	0.4036	WEILL CORNELL MEDICINE	scerevisiae_rsii	Saccharomyces cerevisiae	NRRL Y-567	distillery yeast	whole organism
SAMN09475318_seq	PRJNA477598	PacBio Sequel	3007	254	0.9415	0.9129	WEILL CORNELL MEDICINE	scerevisiae_sequel	Saccharomyces cerevisiae	NRRL Y-567	distillery yeast	whole organism
SAMN09475318_ont	PRJNA477598	ONT GridION	613	52	0.9835	0.9236	WEILL CORNELL MEDICINE	scerevisiae_ont	Saccharomyces cerevisiae	NRRL Y-567	distillery yeast	whole organism

## Sheet: Table S14
Table S14. Types of SVs in SAMN09475318
INSTRUMENT	BND	DEL	DUP	INS	INV	INVDUP
SAMN09475318_na	23	135	12	59	3	24
SAMN09475318_rs	39	138	17	91	15	21
SAMN09475318_seq	109	189	23	197	14	17

## Sheet: Table S15
Table S15. The annotation of overlap SVs in SAMN09475318
Category	Term	Count	PValue	Genes	List Total	Pop Hits	Pop Total	Fold Enrichment	Bonferroni	Benjamini	FDR
GOTERM_BP_DIRECT	GO:0070125~mitochondrial translational elongation	21	1.381680011475364E-29	TI(GAU)Q, TC(GCA)Q, TY(GUA)Q, TR(ACG)Q2, TN(GUU)Q, TS(UGA)Q2, TF(GAA)Q, TT(UAG)Q2, TQ(UUG)Q, TP(UGG)Q, TK(UUU)Q, TW(UCA)Q, TR(UCU)Q1, TV(UAC)Q, TA(UGC)Q, TT(UGU)Q1, TM(CAU)Q2, TM(CAU)Q1, TS(GCU)Q1, TE(UUC)Q, TG(UCC)Q	137	24	5557	35.49178832116788	4.06213923373757E-27	4.06213923373757E-27	1.840652989472616E-26
GOTERM_MF_DIRECT	GO:0030533~triplet codon-amino acid adaptor activity	34	2.316332972562071E-13	TI(GAU)Q, TC(GCA)Q, TY(GUA)Q, TR(ACG)Q2, TS(UGA)Q2, TN(GUU)Q, TF(GAA)Q, TT(UAG)Q2, TP(UGG)Q, TI(AAU)N1, TW(UCA)Q, TV(UAC)Q, TI(AAU)N2, TD(GUC)L2, IMT4, TM(CAU)Q2, TM(CAU)Q1, TS(GCU)Q1, TL(UAA)Q, SUP8, TE(UUC)L, SUP61, TV(AAC)K2, TH(GUG)Q, TQ(UUG)Q, TK(UUU)Q, TD(GUC)Q, TR(UCU)Q1, TA(UGC)Q, TN(GUU)N2, TL(CAA)M, TT(UGU)Q1, TE(UUC)Q, TG(UCC)Q	127	299	4885	4.373897242777764	3.566524853226838E-11	3.566524853226838E-11	2.7782220968219917E-10
KEGG_PATHWAY	sce00970:Aminoacyl-tRNA biosynthesis	33	2.7940572549890232E-11	TI(GAU)Q, TC(GCA)Q, TR(ACG)Q2, TY(GUA)Q, TS(UGA)Q2, TN(GUU)Q, TF(GAA)Q, TP(UGG)Q, TI(AAU)N1, TW(UCA)Q, TV(UAC)Q, TI(AAU)N2, TD(GUC)L2, IMT4, TM(CAU)Q2, TM(CAU)Q1, TS(GCU)Q1, TL(UAA)Q, SUP8, TE(UUC)L, SUP61, TV(AAC)K2, TH(GUG)Q, TQ(UUG)Q, TK(UUU)Q, TD(GUC)Q, TR(UCU)Q1, TA(UGC)Q, TN(GUU)N2, TL(CAA)M, TT(UGU)Q1, TE(UUC)Q, TG(UCC)Q	68	313	2184	3.386205600451043	7.264540080598181E-10	7.264540080598181E-10	2.2913415609338017E-8

## Sheet: Table S16
Table S16. Types of SVs in BY4742 and SY14 using NGMLR
STRAIN	BND	DEL	DUP	INS	INV	INVDUP
BY4742	59	13	21	49	2	40
SY14	59	18	30	188	8	44

## Sheet: Table S17
Table S17. Types of SVs in BY4742 and SY14 using minimap2
STRAIN	BND	DEL	DUP	INS	INV	INVDUP
BY4742	26	4	14	53	1	38
SY14	48	11	23	124	12	53

## Sheet: Table S18
Table S18. The number of chromosome disrtibution SVs on types in BY4742 and SY14
Strain	SV_type	CHR1	CHR2	CHR3	CHR4	CHR5	CHR6	CHR7	CHR8	CHR9	CHR10	CHR11	CHR12	CHR13	CHR14	CHR15	CHR16	CHRMT	P-value	T-value	CI
BY4742	BND	4	5	2	6	4	3	5	9	10	5	0	2	1	0	3	0	0	1.0000	0.0000	-1.0283, 1.0283
SY14	BND	6	6	5	4	3	4	6	11	4	4	1	2	1	0	2	0	0
BY4742	DEL	1	0	3	4	0	0	0	1	0	0	0	4	0	0	0	0	0	0.4277	-0.8138	-1.0603, 0.4721
SY14	DEL	0	0	4	6	1	0	2	1	0	0	0	0	0	0	3	0	1
BY4742	DUP	1	0	2	0	0	0	0	4	0	0	0	7	1	0	0	0	6	0.4094	-0.8471	-1.8543, 0.7954
SY14	DUP	1	0	2	0	0	0	0	1	0	0	0	8	2	0	0	0	16
BY4742	INS	1	2	0	4	3	0	3	2	2	2	3	6	2	7	6	3	3	6.144E-05	-5.3791	-11.3988, -4.9541
SY14	INS	2	16	2	28	9	1	13	9	7	9	10	11	19	10	18	17	7
BY4742	INV	2	0	0	0	0	0	0	0	0	0	0	0	0	0	0	0	0	0.4309	-0.8081	-1.2788, 0.5729
SY14	INV	0	0	0	0	0	0	0	0	0	0	0	0	0	1	0	0	7
BY4742	INVDUP	0	0	0	0	0	0	0	0	0	0	0	0	2	1	0	0	37	0.6015	-0.5327	-1.1716, 0.7010
SY14	INVDUP	0	0	0	0	0	0	0	0	0	0	0	0	0	0	0	0	44

## Sheet: Table S19
Table S19. The annotation of overlap SVs in BY4742 and SY14
Category	Term	Count	PValue	Genes	List Total	Pop Hits	Pop Total	Fold Enrichment	Bonferroni	Benjamini	FDR
GOTERM_BP_DIRECT	GO:0070125~mitochondrial translational elongation	21	5.0298920973858105E-28	TI(GAU)Q, TC(GCA)Q, TY(GUA)Q, TR(ACG)Q2, TN(GUU)Q, TS(UGA)Q2, TF(GAA)Q, TT(UAG)Q2, TQ(UUG)Q, TP(UGG)Q, TK(UUU)Q, TW(UCA)Q, TR(UCU)Q1, TV(UAC)Q, TA(UGC)Q, TT(UGU)Q1, TM(CAU)Q2, TM(CAU)Q1, TS(GCU)Q1, TE(UUC)Q, TG(UCC)Q	162	24	5557	30.014660493827158	1.730282881500719E-25	1.730282881500719E-25	6.861591396077622E-25
GOTERM_MF_DIRECT	GO:0030533~triplet codon-amino acid adaptor activity	32	3.757329525482955E-10	TI(GAU)Q, TC(GCA)Q, SUP53, TR(ACG)Q2, TY(GUA)Q, TS(UGA)Q2, TN(GUU)Q, TF(GAA)Q, TT(UAG)Q2, TP(UGG)Q, TW(UCA)Q, TV(UAC)Q, TM(CAU)C, SUF16, TQ(UUG)C, TM(CAU)Q2, TM(CAU)Q1, TS(GCU)Q1, TL(UAA)Q, TE(UUC)C, TH(GUG)Q, TQ(UUG)Q, TK(UUU)Q, TD(GUC)Q, TR(UCU)Q1, TA(UGC)Q, SUF2, TK(CUU)C, TT(UGU)Q1, TN(GUU)C, TE(UUC)Q, TG(UCC)Q	146	299	4885	3.5808860585513353	6.725620482761485E-8	6.725620482761485E-8	4.6237789153025233E-7
KEGG_PATHWAY	sce00970:Aminoacyl-tRNA biosynthesis	32	7.648723185672384E-9	TI(GAU)Q, TC(GCA)Q, SUP53, TR(ACG)Q2, TY(GUA)Q, TS(UGA)Q2, TN(GUU)Q, TF(GAA)Q, TP(UGG)Q, TW(UCA)Q, TV(UAC)Q, TM(CAU)C, SUF16, TQ(UUG)C, TM(CAU)Q2, TM(CAU)Q1, TS(GCU)Q1, TL(UAA)Q, TE(UUC)C, TH(GUG)Q, TQ(UUG)Q, TK(UUU)Q, TD(GUC)Q, TR(UCU)Q1, TA(UGC)Q, SUF2, TK(CUU)C, SLM5, TT(UGU)Q1, TN(GUU)C, TE(UUC)Q, TG(UCC)Q	77	313	2184	2.8997966889340696	3.288950451985073E-7	3.288950451985073E-7	7.11788785690004E-6

## Sheet: Table S20
Table S20. The function of special SVs in different condition
Strain	Category	Term	Count	P-value	Genes	List Total	Pop Hits	Pop Total	Fold Enrichment	Bonferroni	Benjamini	FDR
BY4742	GOTERM_BP_DIRECT	GO:0009228~thiamine biosynthetic process	6	2.06568e-05	THI5, SNO3, SNO2, THI11, THI12, THI13	149	14	5557	15.9837	0.00869986	0.00869986	0.0290427
BY4742	GOTERM_BP_DIRECT	GO:0009229~thiamine diphosphate biosynthetic process	4	0.000939716	THI5, THI11, THI12, THI13	149	8	5557	18.6477	0.328128	0.0946392	1.3133
BY4742	KEGG_PATHWAY	sce00730:Thiamine metabolism	4	0.00322016	THI5, THI11, THI12, THI13	71	10	2184	12.3042	0.157131	0.157131	3.09782
SY14	GOTERM_CC_DIRECT	GO:0005856~cytoskeleton	12	0.00798686	BNI1, CAP2, DYN1, VRP1, ARK1, TEF1, SPC110, CIK1, BBC1, TUB1, JNM1, TUB3	185	152	5861	2.50114	0.800473	0.800473	9.56972
SY14	GOTERM_BP_DIRECT	GO:0000132~establishment of mitotic spindle orientation	4	0.00851444	BNI1, DYN1, CIK1, JNM1	175	14	5557	9.07265	0.988961	0.67586	11.6661
SY14	GOTERM_CC_DIRECT	GO:0005881~cytoplasmic microtubule	4	0.0126082	DYN1, CIK1, TUB1, TUB3	185	16	5861	7.92027	0.921946	0.720618	14.7144
SY14	GOTERM_CC_DIRECT	GO:0005874~microtubule	6	0.0303054	DYN1, CIK1, XRN1, TUB1, JNM1, TUB3	185	56	5861	3.3944	0.997941	0.643326	32.0255
SY14	GOTERM_BP_DIRECT	GO:0000070~mitotic sister chromatid segregation	4	0.0557391	DYN1, CIK1, TUB1, TUB3	175	28	5557	4.53633	1	0.88455	56.4826
SY14	GOTERM_MF_DIRECT	GO:0005200~structural constituent of cytoskeleton	4	0.0676703	SPC110, TUB1, JNM1, TUB3	161	29	4885	4.18505	1	0.754971	60.4254
SY14	GOTERM_BP_DIRECT	GO:0030473~nuclear migration along microtubule	3	0.078386	DYN1, TUB1, TUB3	175	15	5557	6.35086	1	0.932027	69.4002
SY14	GOTERM_CC_DIRECT	GO:0005816~spindle pole body	6	0.0820107	DYN1, SPC110, CIK1, TUB1, JNM1, TUB3	185	74	5861	2.56874	1	0.852075	65.8156
SY14	GOTERM_BP_DIRECT	GO:0006310~DNA recombination	10	0.00386938	YGR161C-D, YDR034C-D, YBL005W-B, YBL100W-B, HOP2, MMS4, YMR045C, SMC5, MSC6, YBR012W-B	175	100	5557	3.17543	0.870376	0.639967	5.46891

## Sheet: Table S21
Table S21. The number of SVs by combination BLASR,LAST and BWA-SW with five caller
Sample_ID	Alignment	PBHoney	NanoSV	Picky	smartie-sv	Sniffles
SAMD00082707	blasr	871	-	-	42964	-
SAMD00082707	bwasw	453	699	9798	1612	154
SAMD00082707	lastal	-	860	36188	-	281
SAMD00082707	mm2	1440	492	18717	72870	1010
SAMD00082707	ngmlr	357	493	14591	47460	546
SAMN08364553	blasr	2984	-	-	81143	-
SAMN08364553	bwasw	875	159	11500	8211	12
SAMN08364553	lastal	-	-	53	-	13
SAMN08364553	mm2	997	60	8104	104164	255
SAMN08364553	ngmlr	2680	43	9561	81092	248
SAMN08364554	blasr	2010	-	-	93424	-
SAMN08364554	bwasw	119	393	8382	7813	17
SAMN08364554	lastal	-	-	28	-	7
SAMN08364554	mm2	65	111	4433	142206	421
SAMN08364554	ngmlr	1025	90	7485	114629	402
SAMN09475318_na	blasr	392	-	11634	15945	-
SAMN09475318_na	bwasw	388	686	8809	459	75
SAMN09475318_na	lastal	17	2589	88295	-	-
SAMN09475318_na	mm2	467	299	4625	19509	487
SAMN09475318_na	ngmlr	324	253	2303	14717	410
SAMN09475318_rs	blasr	564	-	-	35319	-
SAMN09475318_rs	bwasw	360	743	14160	1470	158
SAMN09475318_rs	lastal	-	3084	31419	-	288
SAMN09475318_rs	mm2	460	435	21200	40921	656
SAMN09475318_rs	ngmlr	308	396	21476	30441	512
SAMN09475318_seq	blasr	2865	-	-	101994	-
SAMN09475318_seq	bwasw	1423	1364	12373	3302	147
SAMN09475318_seq	lastal	-	-	58	-	11
SAMN09475318_seq	mm2	497	366	9254	148540	1201
SAMN09475318_seq	ngmlr	2311	393	7663	110440	908

## Sheet: Table S22
Table S22. Comparing SVs between BY4742 and SV14 using the other combinations
Combination	common	SAMN08364553	SAMN08364554
minimap2_PBHoney	11	962	35
minimap2_NanoSV	6	20	24
minimap2_Picky	55	201	522
minimap2_smartiesv	6583	15581	21136
NGMLR_PBHoney	359	2185	622
NGMLR_NanoSV	10	8	8
NGMLR_Picky	168	601	883
NGMLR_smartiesv	8148	17409	21911
*common: SAMN08364553 and SAMN08364554 shared SVs

[truncated: 2 more sheets: Table S23, Table S24]
